# Supplementary material for: Evolutionary Paths of the cAMP-Dependent Protein Kinase (PKA) Catalytic Subunits
Source: PubMed Central journal article supplement (PMC3625193; doi:10.1371/journal.pone.0060935), 2013-04-12
Supplement: pone.0060935.s001.pdf [file pone.0060935.s001.pdf]

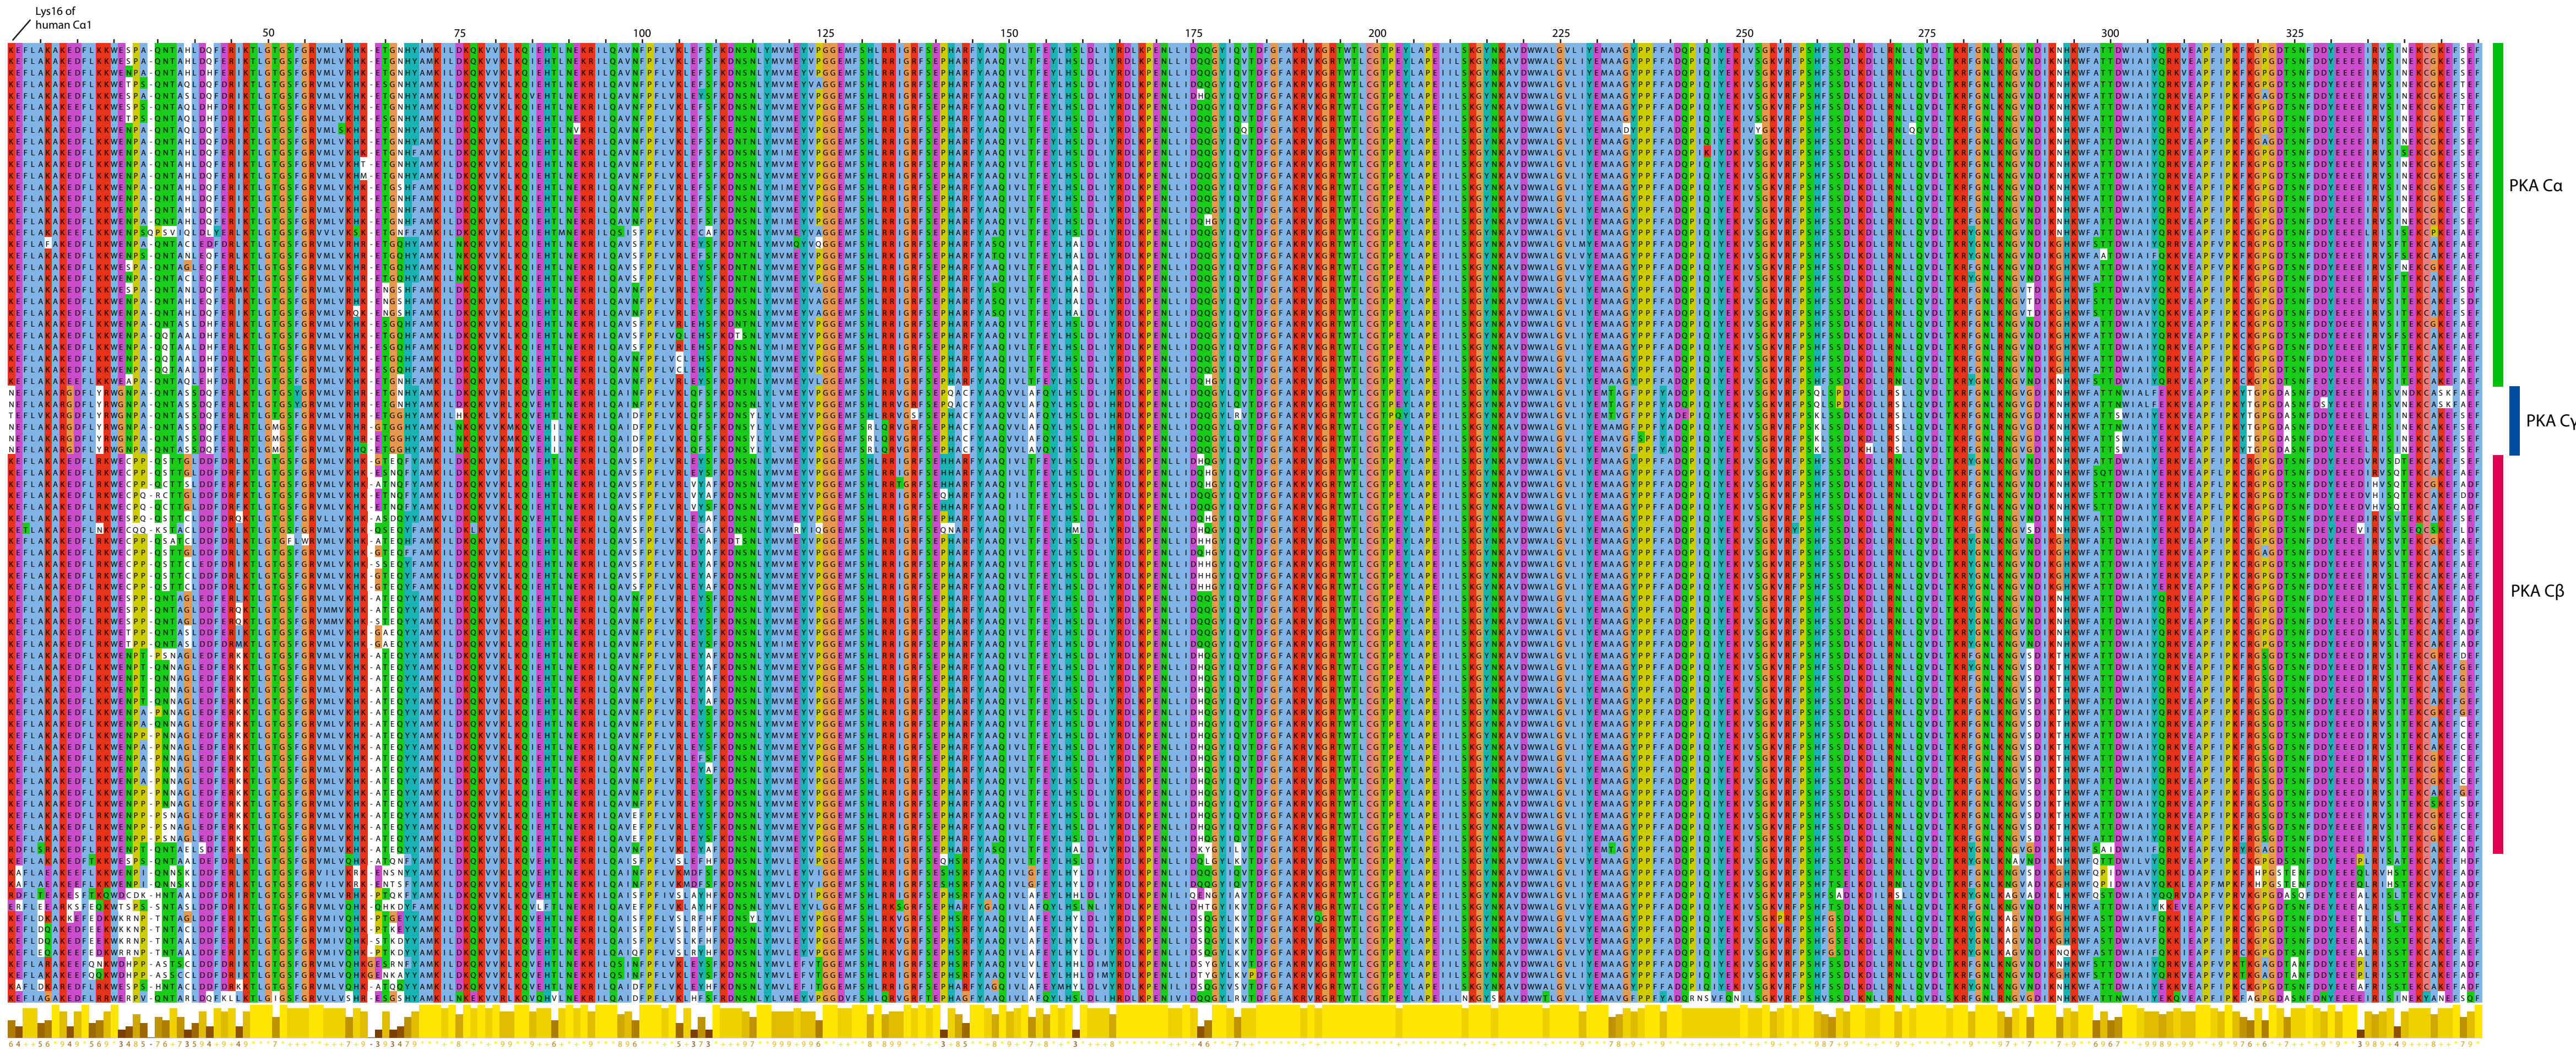

**Figure S1.** Multiple sequence alignment of segment corresponding to exons 2-10 of human PKA Ca1 (*i.e.* residues 16-350). All sequences are described in Materials and Methods S1. Residue numbering of human PKA Ca1 (identifier P17612) is shown above the sequence. Sequences belonging to the  $\alpha$ ,  $\gamma$ , and  $\beta$  clades are marked at the right by a green, blue, and red bar, respectively. The figure was prepared with Jalview (<http://www.jalview.org>).
