# Supplementary material for: Evolutionary Paths of the cAMP-Dependent Protein Kinase (PKA) Catalytic Subunits
Source: PubMed Central journal article supplement (PMC3625193; doi:10.1371/journal.pone.0060935), 2013-04-12
Supplement: pone.0060935.s002.pdf [file pone.0060935.s002.pdf]

**TABLE S1.** Sequence data for PKA catalytic subunit homologs from chordates collected and manipulated as described in Materials and Methods S1.

| Species                   | PKA catalytic subunit homologs in FASTA format                                                                                                                                                                                                                                                                                                                                                                                                                                                                                                                                                                                                                                                                                                                                                                                                                                                                                                                                                                                                                                                                                                                                                                                                                                                                                                                                                     |
|---------------------------|----------------------------------------------------------------------------------------------------------------------------------------------------------------------------------------------------------------------------------------------------------------------------------------------------------------------------------------------------------------------------------------------------------------------------------------------------------------------------------------------------------------------------------------------------------------------------------------------------------------------------------------------------------------------------------------------------------------------------------------------------------------------------------------------------------------------------------------------------------------------------------------------------------------------------------------------------------------------------------------------------------------------------------------------------------------------------------------------------------------------------------------------------------------------------------------------------------------------------------------------------------------------------------------------------------------------------------------------------------------------------------------------------|
| <i>P. troglodytes</i>     | <p>&gt;ENSPTRP00000018062_Pan_troglodytes (a)<br/> MASNSSDVKEFLAKAKEDFLKKWESPAQNTAHLDDQFERIKTLGTGTSFGRVMLVKHKETGNHYAMKILDKQKV<br/> VKLKQIEHTLNEKRILQAVNFPFLVKLEFSFKDNSNLYMVMYVPGGEMFSLRRIRGRFSEPHARFYAAQIV<br/> LTFEYLHSLDLIYRDLKPENLLIDQQGYIQVTDGFAKRVKGRWTWLCGTPPEYLAPEIILSKGYNKAVDWWA<br/> LGVLIYEMAAGYPPFFADQPIQIYEKIVSGKVRFP SHFSDDLKDLLRNLLQVDLTKRFGNLLKNGVNDIKNHK<br/> WFATTDWIAIYQRKVEAPFIPKFKGPGDTSNFDDYEEEEIRVSI NEKCKEFGFSEF</p> <p>&gt;ENSPTRP00000042330_Pan_troglodytes (b)<br/> MAAYREPPCNQYTGTTALQKLEGFASRLFHRHSGKTAHQKTALENDLSHFSEHTALWDRSMKEFLAKAKE<br/> DFLKKWENPTQNNAGLEDFERKKTLGTGTSFGRVMLVKHKATEQYAMKILDKQKVVKLKQIEHTLNEKRILQ<br/> AVNFPFLVRLEYAFKDNSNLYMVMYVPGGEMFSLRRIRGRFSEPHARFYAAQIVLTFEYLHSLDLIYRDLK<br/> PENLLIDHQGYIQVTDGFAKRVKGRWTWLCGTPPEYLAPEIILSKGYNKAVDWWALGVLIYEMAAGYPPFFA<br/> DQPIQIYEKIVSGKVRFP SHFSDDLKDLLRNLLQVDLTKRFGNLLKNGVSDIKTHKWFATTDWIAIYQRKVEA<br/> PFI PKFRGSGDTSNFDDYEEEDI RVSITEKCAKEFGFSEF</p> <p>&gt;ENSPTRP00000035898_Pan_troglodytes (g)<br/> MGNAPAKKDTEQEESVNEFLAKARGDFLYRWGNPAQNTASSDQFERLRTLGMGSFGRVMLVRHRETGGHYAM<br/> KILNKQKVVLMKQVEHILNEKRILQAIDFPFLVKLQFSFKDNSYLYLVMYVPGGEMFSLRRIRGRFSEPHA<br/> CFYAAQVVLAFOYLHSLDLIHRDLKPENLLIDQQGYLQVTDGFAKRVKGRWTWLCGTPPEYLAPEIILSKGY<br/> NKAVDWWALGVLIYEMAVGFSPFYADQPIQIYEKIVSGRVRFP SKLSSDLKDLLSLLQVDLTKRFGNLRNG<br/> VGDIKNHKWFATTSWIAIYEKKVEAPFIPKYTGPGDASNFDYEEEEELRISINEKCAKEFGFSEF</p> |
| <i>G. gorilla</i>         | <p>&gt;ENSGGOT00000006754_Gorilla_gorilla_translated (g)<br/> MGNAPTCKDTEQEESMNEFLAKARGDFLYRWGNPAQNTASSDQFERLRTLGMGSFGRVMLVRHRTGGHYAM<br/> KILNKQKVVLMKQVEHILNEKRILQAIDFPFLVKLQFSFKDNSYLYLVMYVPGGEMFSLRRIRGRFSEPHA<br/> CFYAAQVVLAFOYLHSLDLIHRDLKPENLLIDQQGYLQVTDGFAKRVKGRWTWLCGTPPEYLAPEIILSKGY<br/> NKAVDWWALGVLIYEMAMGFPPFYADQPIQIYEKIVSGRVRFP SKLSSDLKDLLSLLQVDLTKRFGNLRNG<br/> VGDIKNHKWFATTNWIAIYEKKVEAPFIPKYTGPGDASNFDYEEEEELRISINEKCAKEFGFSEF</p>                                                                                                                                                                                                                                                                                                                                                                                                                                                                                                                                                                                                                                                                                                                                                                                                                                                                                                                                          |
| <i>P. pygmaeus abelii</i> | <p>&gt;ENSPPYP00000001399_Pongo_abelii (b)<br/> MAAYREPPCNQYTGTTALQKLEGFASRLFHRHSGKTAHQKTALENDLSHFSEHTALWDRSMKEFLAKAKE<br/> DFLKKWENPTQNNAGLEDFERKKTLGTGTSFGRVMLVKHKATEQYAMKILDKQKVVKLKQIEHTLNEKRILQ<br/> AVNFPFLVRLEYAFKDNSNLYMVMYVPGGEMFSLRRIRGRFSEPHARFYAAQIVLTFEYLHSLDLIYRDLK<br/> PENLLIDHQGYIQVTDGFAKRVKGRWTWLCGTPPEYLAPEIILSKGYNKAVDWWALGVLIYEMAAGYPPFFA<br/> DQPIQIYEKIVSGKVRFP SHFSDDLKDLLRNLLQVDLTKRFGNLLKNGVSDIKTHKWFATTDWIAIYQRKVEA<br/> PFI PKFRGSGDTSNFDDYEEEDI RVSITEKCAKEFGFSEF</p> <p>&gt;ENSPPYP000000021585_Pongo_abelii (g)<br/> MGNAPAKKDTEQEKSATEFLVKARGDFLYRWGNPAQNTASSDQFERLRTLGTGTSFGRVMLVRHRETGGHYAM<br/> KILHKQKLVKLVKQVEHTLNEKRILQAIDFPFLVKLQFSFKDNSYLYLVMYVPGGEMFSLRRIRGRFSEPHA<br/> CFYAAQVVLAFOYLHSLDLIHRDLKPENLLIDQQGYLQVTDGFAKRVKGRWTWLCGTPPEYLAPEIILSKGY<br/> NKAVDWWALGVLIYEMTAGFPPFYADEPIQIYEKIVSGRVRFP SKLSSDLKDLLSLLQVDLTKRFGNLRNG<br/> VGDIKNHKWFATTNWIAIYEKKVEAPFIPKYTGPGDASNFDYEEEEELRISINEKCAKEFGFSEF</p>                                                                                                                                                                                                                                                                                                                                                                                                                                                |
| <i>M. mulatta</i>         | <p>&gt;ENSMUP00000004604_Macaca_mulatta (b)<br/> SVKEFLAKAKEDFLKKWENPTQNNAGLEDFERKKTLGTGTSFGRVMLVKHKATEQYAMKILDKQKVVKLKQI<br/> EHTLNEKRILQAVNFPFLVRLEYAFKDNSNLYMVMYVPGGEMFSLRRIRGRFSEPHARFYAAQIVLTFEYL<br/> HSLDLIYRDLKPENLLIDHQGYIQVTDGFAKRVKGRWTWLCGTPPEYLAPEIILSKGYNKAVDWWALGVLI<br/> EMAAGYPPFFADQPIQIYEKIVSGKVRFP SHFSDDLKDLLRNLLQVDLTKRYGNLLKNGVSDIKTHKWFATTD<br/> WIAIYQRKVEAPFIPKFKGPGDTSNFDDYEEEDI RVSITEKCAKEFGFSEF</p> <p>&gt;ENSMUP000000026815_Macaca_mulatta (g)<br/> MGNAAAKKDTEQETVNEFLAKARGDFLYRWGNPAQNTASSDQFERLRTLGTGTSYGRVMLVRHRETGNHYAM<br/> ILDKQKVVRLKQVEHTLNEKRILQAIDFPFLVKLQFSFKDNSNLYLVMYVPGGEMFSLRRIRGRFSEPHAR<br/> FYAAQVVLAFOYLHSLDLIHRDLKPENLLIDQQGYLQVTDGFAKRVKGRWTWLCGTPPEYLAPEIILSKGYN<br/> KAVDWWALGVLIYEMTAGFPPFYADQPIQIYEKIVSGKVRFP SQLSPDLKDLLSLLQVDLTKRFGNLLKNGV<br/> GDIKNHKWFATTNWIALFEKKVEAPFIPKYTGPGDASNFDYEEEEELRISVNEKCAKFAEF</p>                                                                                                                                                                                                                                                                                                                                                                                                                                                                                                                      |
| <i>P. hamadryas</i>       | <p>&gt;ENSP000000366488_Papio_hamadryas (g)<br/> MGNAAAKKDTEQESVNEFLAKARGDFLYRWGNPAQNTASSDQFERLRTLGTGTSYGRVMLVRHRETGNHYAM<br/> ILDKQKVVRLKQVEHTLNEKRILQAIDFPFLVKLQFSFKDNSNLYLVMYVPGGEMFSLRRIRGRFSEPHAR<br/> FYAAQVVLAFOYLHSLDLIHRDLKPENLLIDQQGYLQVTDGFAKRVKGRWTWLCGTPPEYLAPEIILSKGYN<br/> KAVDWWALGVLIYEMTAGFPPFYADQPIQIYEKIVSGKVRFP SQLSPDLKDLLSLLQVDLTKRFGNLLKNGV<br/> GDIKNHKWFATTNWIALFEKKVEAPFIPKYTGPGDASNFDYEEEEELRISVNEKCAKFAEF</p>                                                                                                                                                                                                                                                                                                                                                                                                                                                                                                                                                                                                                                                                                                                                                                                                                                                                                                                                                         |

|                            |                                                                                                                                                                                                                                                                                                                                                                                                                                                                                                                                                                                                                                                                                                                                                                                                                                                                                                                                                                                                                                                                                                                                                                                                                                                                                                                                          |
|----------------------------|------------------------------------------------------------------------------------------------------------------------------------------------------------------------------------------------------------------------------------------------------------------------------------------------------------------------------------------------------------------------------------------------------------------------------------------------------------------------------------------------------------------------------------------------------------------------------------------------------------------------------------------------------------------------------------------------------------------------------------------------------------------------------------------------------------------------------------------------------------------------------------------------------------------------------------------------------------------------------------------------------------------------------------------------------------------------------------------------------------------------------------------------------------------------------------------------------------------------------------------------------------------------------------------------------------------------------------------|
| <p><i>C. jacchus</i></p>   | <p>&gt;ENSCJAP00000045124_Callithrix_jacchus (b)<br/> MGNAATAKKGSEVESVKEFLAKAKEDFLKKWENPTSPNAGLEDFERKKTTLGTGSFGRVMLVKHKATEQYYAM<br/> KILDKQKVVKLKQIEHTLNEKRILQAVNFPFLVRLLEYAFKDNSNLYMVMVEYVPGGEMFSLHRRIGRFSEPHA<br/> RFYAAQIVLTFEYLHSLDLIYRDLKPENLLIDHQGYIQVTDGFAKRVKGRWTWLCGTPEYLAPETILSKGY<br/> NKAVDWWALGVLIYEMAAGYPPFFADQPIQIYEKIVSGKVRFPSPHFSSDLKDLLRNLQVLDLTKRFGNLKNG<br/> VSDIKTHKWFATTDWIAIYQRKVEAPFIPKFRGSGDTSNFDDYEEEDIRVSITEKCGREFDEF</p> <p>&gt;ENSCJAP00000049480_Callithrix_jacchus_truncated (g)<br/> RAKEDFLYRWEHPVQNTASSDQFELLKTLGAGSFGRVVLVRHQESGGHYAMKILNKQKVVKLKQVEQVLSEK<br/> RILQAINFPFLVQLQFSFRDNSNLYLVMEYVPGGDMFSLRRLRVGKFRPHACFCAAQIVLAFQYLYHSRDLIH<br/> RDLKPENIVIDQQGYLRVTDGFAKRVKGRWTWLCGTPEYLAPETILNKGYKAVDWWALGVLIYEMAMGFP<br/> PFYADQAVQIYQKIVSGKVQFPSPHVSSDLKDLLRNLQVLDLSKRFGNLRNGVGDINKHKWFTTTNWIAYEK<br/> KVKAPFIPKLAGPGDASNFDNYEEEEIWSINEKCANEFSEF</p> <p>&gt;ENSCJAP00000040924_Callithrix_jacchus (rt)<br/> MGNVPAKDEQKVVKEFIAGAKEDFLRRWERPVQNTARLDQFKLLKTLGIGSFGRVVLVSHRESGSHYAMKI<br/> LNKEKVVRLKQVQVHLNEKRILQAITDFPFLVRLHFSFRDNSNLYLVMEYVPGGDVPSHLQVGRFTEPHAGF<br/> YAAQIVLAFQYLYHSLDLIHRDLKPENIVIDQQGYLRVTDGFAKRVKGRWTWLCGTPEYLAPETILNKGYK<br/> AVDWWTLGVLIYEMAVGFPFFYADQRNSVFQNILSGKVRFPSPHVSSDLKDLLRNLQVLDLSKRFGNLRNGV<br/> DINKHKWFATTDWIAIYEQVEAPFIPKFAKPGDASNFDNYEEEEIRISINEKYANEFSEQF</p> |
| <p><i>O. garnettii</i></p> | <p>&gt;ENSOGAP00000010597_Otolemur_garnettii (a)<br/> MGNAAAAKKGSEQESVKEFLAKAKEDFLKKWENPAQNTAHLDFERIKTLGTGSFGRVMLVRHKETGNHYAM<br/> KILDKQKVVKLKQIEHTLNEKRILQAVNFPFLVRLLEYAFKDNSNLYMVMVEYVPGGEMFSLHRRIGRFSEPHA<br/> RFYAAQIVLTFEYLHSLDLIYRDLKPENLLIDQQGYIQVTDGFAKRVKGRWTWLCGTPEYLAPETILSKGY<br/> NKAVDWWALGVLIYEMAAGYPPFFADQPIQIYEKIVSGKVRFPSPHFSSDLKDLLRNLQVLDLTKRFGNLKNG<br/> VNDIKNHKWFATTDWIAIYQRKVEAPFIPKFKGPGDTSNFDDYEEEDIRVINEKCGKEFSEF</p> <p>&gt;ENSOGAP00000005225_Otolemur_garnettii (b)<br/> MAAYRELPNCQFTGTTTALQKLEGFASRLFHRHSGKADLKTALENDSLHFSEHTAVWDRSMKEFLAKAKEDF<br/> LKKWENPPNNAGLEDFERKKTTLGTGSFGRVMLVKHKATEQYYAMKILDKQKVVKLKQIEHTLNEKRILQAV<br/> NFPFLVRLLEYAFKDNSNLYMVMVEYVPGGEMFSLHRRIGRFSEPHARFYAAQIVLTFEYLHSLDLIYRDLKPE<br/> NLLIDHQGYIQVTDGFAKRVKGRWTWLCGTPEYLAPETILSKGYKAVDWWALGVLIYEMAAGYPPFFADQ<br/> PIQIYEKIVSGKVRFPSPHFSSDLKDLLRNLQVLDLTKRFGNLKNGVSDIKTHKWFATTDWIAIYQRKVEAP<br/> FIPKFRGSGDTSNFDDYEEEDIRVITEKCAKEFGEF</p>                                                                                                                                                                                                                                                                                                                                                                                   |
| <p><i>T. syrichta</i></p>  | <p>&gt;ENSTSYPO0000000346_Tarsius_syrichta (b)<br/> MAAYRELPNCQYFTGTTTALQKLEGFASRLFHRHSGKTAHQDKTALENDSLHFSEHTASWDRSMKEFLAKAKE<br/> DFLKKWENPAPNNAGLEDFERKKTTLGTGSFGRVMLVKHKATEQYYAMKILDKQKVVKLKQIEHTLNEKRILQ<br/> AVNFPFLVRLLEYAFKDNSNLYMVMVEYVPGGEMFSLHRRIGRFSEPHARFYAAQIVLTFEYLHSLDLIYRDLK<br/> PENLLIDHQGYIQVTDGFAKRVKGRWTWLCGTPEYLAPETILSKGYKAVDWWALGVLIYEMAAGYPPFFA<br/> DQPIQIYEKIVSGKVRFPSPHFSSDLKDLLRNLQVLDLTKRFGNLKNGVSDIKTHKWFATTDWIAIYQRKVEA<br/> PFIKFRGSGDTSNFDDYEEEDIRVITEKCGKEFGEF</p>                                                                                                                                                                                                                                                                                                                                                                                                                                                                                                                                                                                                                                                                                                                                                                                                                                    |
| <p><i>S. scrofa</i></p>    | <p>&gt;ENSSSCP00000014641_Sus_scrofa (a)<br/> MGNAAAAKKGSEQESVKEFLAKAKEDFLKKWENPAQNTAHLQDFERIKTLGTGSFGRVMLVKHKETGNHFAM<br/> KILDKQKVVKLKQIEHTLNEKRILQAVNFPFLVRLLEYAFKDNSNLYMVMVEYVPGGEMFSLHRRIGRFSEPHA<br/> RFYAAQIVLTFEYLHSLDLIYRDLKPENLLIDQQGYIQVTDGFAKRVKGRWTWLCGTPEYLAPETILSKGY<br/> NKAVDWWALGVLIYEMAAGYPPFFADQPIQIYEKIVSGKVRFPSPHFSSDLKDLLRNLQVLDLTKRFGNLKNG<br/> VNDIKNHKWFATTDWIAIYQRKVEAPFIPKFKGPGDTSNFDDYEEEDIRVINEKCGKEFSEF</p>                                                                                                                                                                                                                                                                                                                                                                                                                                                                                                                                                                                                                                                                                                                                                                                                                                                                                               |
| <p><i>D. ordii</i></p>     | <p>&gt;ENSODORP00000014055_Dipodomys_ordii (a)<br/> MGNAAAAKKGSEQESVKEFLAKAKEDFLKKWENPAQNTAHLQDFDRIKTLGTGSFGRVMLVKHKETGNHYAM<br/> KILDKQKVVKLKQIEHTLNEKRILQAVNFPFLVRLLEYAFKDNSNLYMVMVEYVPGGEMFSLHRRIGRFSEPHA<br/> RFYAAQIVLTFEYLHSLDLIYRDLKPENLLIDQQGYIQVTDGFAKRVKGRWTWLCGTPEYLAPETILSKGY<br/> NKAVDWWALGVLIYEMAAGYPPFFADQPIQIYEKIVSGKVRFPSPHFSSDLKDLLRNLQVLDLTKRFGNLKNG<br/> VNDIKNHKWFATTDWIAIYQRKVEAPFIPKFKGAGDTSNFDDYEEEDIRVINEKCGKEFSEF</p>                                                                                                                                                                                                                                                                                                                                                                                                                                                                                                                                                                                                                                                                                                                                                                                                                                                                                         |
| <p><i>C. porcellus</i></p> | <p>&gt;ENSCPOP00000016885_Cavia_porcellus (a)<br/> SVKEFLAKAKEDFLKKWESPAQNTASLDQDFRIKTLGTGSFGRVMLVKHKETGNHYAMKILDKQKVVKLKQV<br/> EHTLNEKRILQAVNFPFLVRLLEYAFKDNSNLYMVMVEYVPGGEMFSLHRRIGRFSEPHARFYAAQIVLTFEYL<br/> HSLDLIYRDLKPENLLIDHQGYIQVTDGFAKRVKGRWTWLCGTPEYLAPETILSKGYKAVDWWALGVLIY<br/> EMAAGYPPFFADQPIQIYEKIVSGKVRFPSPHFSSDLKDLLRNLQVLDLTKRFGNLKNGVNDIKNHKWFATTD<br/> WIAIYQRKVEAPFIPKFKGAGDTSNFDDYEEEDIRVINEKCGKEFSEF</p> <p>&gt;ENSCPOP00000008705_Cavia_porcellus (b)<br/> LRNSYMTKPFYSYMFVKEFLAKAKEDFLKKWENPPNNAGLEDFERKKTTLGTGSFGRVMLVKHKATEQYYAM<br/> KILDKQKVVKLKQIEHTLNEKRILQAVNFPFLVRLLEYAFKDNSNLYMVMVEYVPGGEMFSLHRRIGRFSEPHA<br/> RFYAAQIVLTFEYLHSLDLIYRDLKPENLLIDHQGYIQVTDGFAKRVKGRWTWLCGTPEYLAPETILSKGY<br/> NKAVDWWALGVLIYEMAAGYPPFFADQPIQIYEKIVSGKVRFPSPHFSSDLKDLLRNLQVLDLTKRFGNLKNG<br/> VSDIKTHKWFATTDWIAIYQRKVEAPFIPKFRGSGDTSNFDDYEEEDIRVITEKCSKEFSDF</p>                                                                                                                                                                                                                                                                                                                                                                                                                                                         |
| <p><i>O. cuniculus</i></p> | <p>&gt;ENSOCUP00000003134_Oryctolagus_cuniculus (b)<br/> MGNAATAKKGSEVESVKEFLAKAKEDFLKKWENPPNNAGLEDFERKKTTLGTGSFGRVMLVKHKATEQYYAM<br/> KILDKQKVVKLKQIEHTLNEKRILQAVNFPFLVRLLEYAFKDNSNLYMVMVEYVPGGEMFSLHRRIGRFSEPHA<br/> RFYAAQIVLTFEYLHSLDLIYRDLKPENLLIDHQGYIQVTDGFAKRVKGRWTWLCGTPEYLAPETILSKGY<br/> NKAVDWWALGVLIYEMAAGYPPFFADQPIQIYEKIVSGKVRFPSPHFSSDLKDLLRNLQVLDLTKRFGNLKNG<br/> VSDIKTHKWFATTDWIAIYQRKVEAPFIPKFRGSGDTSNFDDYEEEDIRVITEKCAKEFCEF</p>                                                                                                                                                                                                                                                                                                                                                                                                                                                                                                                                                                                                                                                                                                                                                                                                                                                                                    |

|                        |                                                                                                                                                                                                                                                                                                                                                                                                                                                                                                                                                                                                                                                                                                                                                                                                                                                                                                                                            |
|------------------------|--------------------------------------------------------------------------------------------------------------------------------------------------------------------------------------------------------------------------------------------------------------------------------------------------------------------------------------------------------------------------------------------------------------------------------------------------------------------------------------------------------------------------------------------------------------------------------------------------------------------------------------------------------------------------------------------------------------------------------------------------------------------------------------------------------------------------------------------------------------------------------------------------------------------------------------------|
| <i>E. caballus</i>     | <p>&gt;ENSECAP00000020287 Equus caballus (b)<br/>MSARKSSEASACSSSEVSVEFLAKAKEDFLKKWENPAQNNAGLEDFERKKTTLGTGSFGRVMLVKHKATEQY<br/>YAMKILDKQKVVKLKQIEHTLNEKRILQAVNFPFLVRLLEYSFKDNSNLYMMEYVPGGEMFSLRRIGRFSE<br/>PHARFYAAQIVLTFEYLHSLDLIYRDLKPENLLIDHQGYIQVTDGFAKRVKGRWTWLCGTPEYLAPEIILSKGY<br/>KGYNKAVDWWALGVLIYEMAAGYPPFFADQPIQIYEKIVSGKVRFPSSHFSDDLKDLLRNLLQVDLTKRFGNL<br/>KNGVSDIKTHKWFATTDWIAIYQRKVEAPFIPKFRGSGDTSNFDDYEEEDIRVSI TEKCAKEFCE</p>                                                                                                                                                                                                                                                                                                                                                                                                                                                                                              |
| <i>P. vampyrus</i>     | <p>&gt;ENSPVAP00000016560 Pteropus vampyrus (a)<br/>MGNAAAACGGSEQESVKEFLAKAKEDFLKKWENPAQNTAHLDQFERIKTLGTGSFGRVMLVKHKETGSHFAM<br/>KILDKQKVVKLKQIEHTLNEKRILQAVNFPFLVRLLEYSFKDNSNLYMIMEYVPGGEMFSLRRIGRFSEPHA<br/>RFYAAQIVLTFEYLHSLDLIYRDLKPENLLIDQQGYIQVTDGFAKRVKGRWTWLCGTPEYLAPEIILSKGY<br/>NKAVDWWALGVLIYEMAAGYPPFFADQPIQIYEKIVSGKVRFPSSHFSDDLKDLLRNLLQVDLTKRFGNLKNG<br/>VNDIKNHKWFATTDWIAIYQRKVEAPFIPKFKGPGDTSNFDDYEEEDIRVSI NEKCGKEFSE</p>                                                                                                                                                                                                                                                                                                                                                                                                                                                                                                |
| <i>T. truncatus</i>    | <p>&gt;ENSTTRP00000013926 Tursiops truncatus (a)<br/>MGNAAAPKGGSEQESVKEFLAKAKEDFLKKWENPAQNTAHLDQFERIKTLGTGSFGRVMLVKHKETGNHFAM<br/>KILDKQKVVKLKQIEHTLNEKRILQAVNFPFLVRLLEYSFKDNSNLYMIMEYVPGGEMFSLRRIGRFSEPHA<br/>RFYAAQIVLTFEYLHSLDLIYRDLKPENLLIDQQGYIQVTDGFAKRVKGRWTWLCGTPEYLAPEIILSKGY<br/>NKAVDWWALGVLIYEMAAGYPPFFADQPIKIYDKIVSGKVRFPSSHFSDDLKDLLRNLLQVDLTKRFGNLKNG<br/>VNDIKNHKWFATTDWIAIYQRKVEAPFIPKFKGPGDTSNFDDYEEEDIRVSI SEKCGKEFSE</p> <p>&gt;ENSTTRP00000010712 Tursiops truncatus (b)<br/>MAAYRELPCNQYTGTALQKLEGFASRLFHRHSGKTAHDQKTTLENSLHFSEHTALWDRSMKEFLAKAKED<br/>FLKKWENPAPNNAGLEDFERKKTTLGTGSFGRVMLVKHKATEQYYAMKILDKQKVVKLKQIEHTLNEKRILQ<br/>AVNFPFLVRLLEYSFKDNSNLYMMEYVPGGEMFSLRRIGRFSEPHARFYAAQIVLTFEYLHSLDLIYRDLK<br/>PENLLIDHQGYIQVTDGFAKRVKGRWTWLCGTPEYLAPEIILSKGYNKAVDWWALGVLIYEMAAGYPPFFAD<br/>QPIQIYEKIVSGKVRFPSSHFSDDLKDLLRNLLQVDLTKRFGNLKNGVSDIKTHKWFATTDWIAIYQRKVEAP<br/>FIPKFRGSGDTSNFDDYEEEDIRVSI TEKCGKEFCE</p> |
| <i>M. eugenii</i>      | <p>&gt;ENSMEUP00000001850 Macropus eugenii (a)<br/>KEFLAKAKEEFLKKWESPQSTVQLDQFDRIKTLGTGSFGRVILVKHRETGNFYAMKVLKQKVVKLKQIEH<br/>TMNEKRILQAINFPFLVRLLEYSFKDNTNLYMMEYVPGGEMFSLRRIGRFSEPHARFYAAQIVLTFEYLH<br/>SLDLIYRDLKPENLLIDQQGYIQVTDGFAKRVKGRWTWLCGTPEYLAPEIILSKGYNKAVDWWALGVLIYEM<br/>AAGYPPFFADQPIQIYEKIVSGKVRFPSSHFSDDLKDLLRNLLQVDLTKRYGNLKNVNDIKNHKWFATTDWI<br/>AIYQRK</p> <p>&gt;ENSMEUP00000011811 Macropus eugenii (rt)<br/>MGNAAATKGGSELESVKEFLAKAKEEFLKWEAPAQNTALEHFDRIKTLGTGSFGRVMLVKHKETGNHFAM<br/>KILDKQKVVKLKQIEHTLNEKRILQAVNFPFLVRLLEYSFKDNTNLYMMEYVVLGGEMFSLRRIGRFSEPHA<br/>RFYAAQIVLTFEYLHSLDLIYRDLKPENLLIDQHGYYIQVTDGFAKRVKGRWTWLCGTPEYLAPEIILSKGY<br/>NKAVDWWALGVLIYEM</p>                                                                                                                                                                                                                                                |
| <i>M. domestica</i>    | <p>&gt;ENSMODP00000015141 Monodelphis domestica (a)<br/>SVKEFLAKAKEEFLKKWENPSQPSVIQLDLYERLKTTLGTGSFGRVVLVKSKETGNFFAMKILDKQKVVKLKQ<br/>IEHTMNEKRILQISFPFLVKLECAFKNNSNLYMMEYVAGGEMFSLRRIGRFSEPHARFYAAQIVLTFEYL<br/>HSLDLIYRDLKPENLLIDQQGYIQVTDGFAKRVKGRWTWLCGTPEYLAPEIILSKGYNKAVDWWALGVLI<br/>YEMAAGYPPFFADQPIQIYEKIVSGKVRFPSSHFSDDLKDLLRNLLQVDLTKRYGNLKNVNDIKNHKWFATT<br/>DWIAIYQRKVEAPFIPKCKGPGDTSNFDDYEEELRISISEKCKEFAEF</p>                                                                                                                                                                                                                                                                                                                                                                                                                                                                                                              |
| <i>A. carolinensis</i> | <p>&gt;ENSACAP00000005713 Anolis carolinensis (b)<br/>MAAQKELQGNPSTGTANALQRLEGFANRLFHRHSGSSSELKAAQENESPHFSELAALWERSMKEFLAKAKE<br/>DFLRKWESPQNTAGLEDFERLKTTLGTGSFGRVMLVKHKATEQYAMKILDKQKVVKLKQIEHTLNEKRILQ<br/>AVNFPFLVRLLEYSFKDNSNLYMMEYVPGGEMFSLRRIGRFSEPHARFYAAQIVLTFEYLHSLDLIYRDLK<br/>PENLLIDQQGYIQVTDGFAKRVKGRWTWLCGTPEYLAPEIILSKGYNKAVDWWALGVLIYEMAAGYPPFFA<br/>DQPIQIYEKIVSGKVRFPSSHFSDDLKDLLRNLLQVDLTKRYGNLKNVNDIKNHKWFATTDWIAIYQRKVEA<br/>PFIKCRGPGDTSNFDDYEEEDIRVSLTEKCAKEFADF</p>                                                                                                                                                                                                                                                                                                                                                                                                                                               |

|                            |                                                                                                                                                                                                                                                                                                                                                                                                                                                                                                                                                                                                                                                                                                                                                                                                                                                                                                                                                                                                                                                                                                                                                                                                                                                                                                                                                                                                                                                                                                                                                                                                                                                                                                                                                                                                                                                             |
|----------------------------|-------------------------------------------------------------------------------------------------------------------------------------------------------------------------------------------------------------------------------------------------------------------------------------------------------------------------------------------------------------------------------------------------------------------------------------------------------------------------------------------------------------------------------------------------------------------------------------------------------------------------------------------------------------------------------------------------------------------------------------------------------------------------------------------------------------------------------------------------------------------------------------------------------------------------------------------------------------------------------------------------------------------------------------------------------------------------------------------------------------------------------------------------------------------------------------------------------------------------------------------------------------------------------------------------------------------------------------------------------------------------------------------------------------------------------------------------------------------------------------------------------------------------------------------------------------------------------------------------------------------------------------------------------------------------------------------------------------------------------------------------------------------------------------------------------------------------------------------------------------|
| <p><i>T. rubripes</i></p>  | <p>&gt;ENSTRUP00000013710 Takifugu rubripes (a)<br/> MGNAPTARKGSEMESVKEFLAKAKEDFLKKWENPAQNTACLEQFERLKTTLGTGSFGRVMLVKHRETGQHYAM<br/> KILNKQKVVKLKQIEHTLNEKRI LQAVSFPFLVRLVLEYSFKDNTNLYMVMEYVPGGEMFSLHRRIGRFSEPHA<br/> RFYAAQIVLTFEYLHSLDLIYRDLKPENLLIDQQGYIQVTDGFGFAKRVKGRWTWLCGTPEYLAPEI ILSKGY<br/> NKAVDWWALGVLVYEMAAGYPPFFADQPIQIYEKIVSGKVRFPSPHFSSDLKDLLRNLQVLDLTKRFGNLKNG<br/> VNDIKGHKWFATTDWIAIYQKKEVAPFIPKCKGPGDTSNFDDYEEEEIRVSFTEKCAKEFAEF</p> <p>&gt;ENSTRUP00000032221 Takifugu rubripes (a)<br/> MGNTPTTKKGNEMESVKEFLAKAKEDFLKKWENPAQNTAALDHFERLKTTLGTGSFGRVMLVKHKEGQHFAM<br/> KILNKQKVVKLKQIEHTLNEKRI LQAVNFPFLVLCLEHSFKDNSNLYMVMEYVPGGEMFSLHRRIGRFSEPHA<br/> RFYAAQIVLTFEYLHSLDLIYRDLKPENLLIDQQGYIQVTDGFGFAKRVKGRWTWLCGTPEYLAPEI ILSKGY<br/> NKAVDWWALGVLVYEMAAGYPPFFADQPIQIYEKIVSGKVRFPSPHFSSDLKDLLRNLQVLDLTKRFGNLKNG<br/> VNDIKGHKWFATTDWIAIYQKKEVAPFIPKCKGPGDTSNFDDYEEEEIRVSI TEKCAKEFAEF</p> <p>&gt;ENSTRUP00000015108 Takifugu rubripes (b)<br/> MGNAATAKKGNEQESVKEFLAKAKEDFLRKWECPPQCTTGLDDDFRDKTLGTGSFGRVMLVKHKETNQFYAM<br/> KILDKQKVVKLKQIEHTLNEKRI LQAVSFPFLVRLVYSFKDNSNLYMVMEYVPGGEMFSLHRRIGRFSEHHA<br/> RFYAAQI I LTFEYLHSLDLIYRDLKPENLLIDQQGYIQVTDGFGFAKRVKGRWTWLCGTPEYLAPEI ILSKGY<br/> NKAVDWWALGVLVYEMAAGYPPFFADQPIQIYEKIVSGKVRFPSPHFSSDLKDLLRNLQVLDLTKRFGNLKNG<br/> VNDIKNHKWFSTTDWIAIYERKVEAPFIPKCRGPGDTSNFDDYEEEDVHVSQTEKCAKEFADF</p> <p>&gt;ENSTRUP00000026750 Takifugu rubripes (b)<br/> MGNAATAKKGNELESVKEFLAKAKEDFLRKWECPPQSTTCLDDDFRDLKTTLGTGSFGRVMLVKHKGTQFYAM<br/> KILDKQKVVKLKQIEHTLNEKRI LQAVSFPFLVRLVYAFKDNSNLYMVMEYVPGGEMFSLHRRIGRFSEPHA<br/> RFYAAQIVLTFEYLHSLDLIYRDLKPENLLIDHHGYIQVTDGFGFAKRVKGRWTWLCGTPEYLAPEI ILSKGY<br/> NKAVDWWALGVLVYEMAAGYPPFFADQPIQIYEKIVSGKVRFPSPHFSSDLKDLLRNLQVLDLTKRFGNLKNG<br/> VNDIKGHKWFATTDWIAIYERKVEAPFIPKCRGPGDTSNFDDYEEEEIRVSLTEKCAKEFAEF</p>                                 |
| <p><i>O. latipes</i></p>   | <p>&gt;ENSORLP00000008832 Oryzias latipes (a)<br/> AAIPTHNMFLFAVKEFLAKAKEDFLKKWENPAQNTAALDHFERLKTTLGTGSFGRVMLVKHKETGQHFAMKIL<br/> DKQKVVKLKQIEHTLNEKRI LQAVSFPFLVQLEHSFKDTSNLYMVMEYVPGGEMFSLHRRIGRFSEPHARFY<br/> AAQIVLTFEYLHSLDLIYRDLKPENLLIDQQGYIQVTDGFGFAKRVKGRWTWLCGTPEYLAPEI ILSKGY<br/> VDWWALGVLVYEMAAGYPPFFADQPIQIYEKIVSGKVRFPSPHFSSDLKDLLRNLQVLDLTKRFGNLKNGVND<br/> IKGHKWFATTDWIAIYQKKEVAPFIPKCKGPGDTSNFDDYEEEEIRVSFSEKCAKEFAEF</p> <p>&gt;ENSORLP00000018527 Oryzias latipes truncated (a)<br/> VKEFLAKAKEDFLKKWENPSONTANLEQFERLKTTLGTGSFGRVMLVKHRETGQHYAMKILNKQKVVKLKQIE<br/> HTLNEKRI LQAVSFPFLVRLVLEYSFKDNTNLYMVMEYVPGGEMFSLHRRIGRFSEPHARFYATQIVLTFEYLH<br/> ALDLIYRDLKPENLLIDQQGYIQVTDGFGFAKRVKGRWTWLCGTPEYLAPEI ILSKGYNKAVDWWALGVLVY<br/> EMAAGYPPFFADQPIQIYEKIVSGKVRFPSPHFSSDLKDLLRNLQVLDLTKRFGNLKNGVNDIKGHKWFATTDW<br/> IAIYQKKEVAPFIPKCKGPGDTSNFDDYEEEEIRVSFSEKCAKEFAEF</p> <p>&gt;ENSORLP00000007943 Oryzias latipes (b)<br/> MGNTATAKKGNEQESVKEFLAKAKEDFLRKWECPPQCTTSLDDDFERFKTTLGTGSFGRVMLVKHKATNQFYAM<br/> KILDKQKVVKLKQIEHTLNEKRI LQAVSFPFLVRLVYAFKDNSNLYMVMEYVPGGEMFSLHRRIGRFSEHHA<br/> RFYAAQIVLTFEYLHSLDLIYRDLKPENLLIDHHGYIQVTDGFGFAKRVKGRWTWLCGTPEYLAPEI ILSKGY<br/> NKAVDWWALGVLVYEMAAGYPPFFADQPIQIYEKIVSGKVRFPSPHFSSDLKDLLRNLQVLDLTKRFGNLKNG<br/> VNDIKNHKWFSTTDWIAIYERKIEAPFIPKCRGPGDTSNFDDYEEEDIHVSQTEKCGKEFADF</p> <p>&gt;ENSORLP00000021647 Oryzias latipes (b)<br/> MGNAATAKKGNELESVKEFLAKAKEDFLRKWECPPQSTTCLDDDFRDKTLGTGSFGRVMLVKHKSSEQFYAM<br/> KILDKQKVVKLKQIEHTLNEKRI LQAVSFPFLVRLVYAFKDNSNLYMVMEYVPGGEMFSLHRRIGRFSEPHA<br/> RFYAAQIVLTFEYLHSLDLIYRDLKPENLLIDHHGYIQVTDGFGFAKRVKGRWTWLCGTPEYLAPEI ILSKGY<br/> NKAVDWWALGVLVYEMAAGYPPFFADQPIQIYEKIVSGKVRFPSPHFSSDLKDLLRNLQVLDLTKRFGNLKNG<br/> VNDIKGHKWFATTDWIAIYERKVEAPFIPKCRGPGDTSNFDDYEEEEIRVSLTEKCAKEFAEF</p>                                                      |
| <p><i>G. aculeatus</i></p> | <p>&gt;ENSGACP00000013822 Gasterosteus aculeatus (a)<br/> MGNTPTAKKGNEMESVKEFLAKAKEDFLKKWENPAQNTAALDHFERLKTTLGTGSFGRVMLVKHKEGQHFAM<br/> KILDKQKVVKLKQIEHTLNEKRI LQAVSFPFLVRLVLEYSFKDNTNLYMIMEYVPGGEMFSLHRRIGRFSEPHA<br/> RFYAAQIVLTFEYLHSLDLIYRDLKPENLLIDQQGYIQVTDGFGFAKRVKGRWTWLCGTPEYLAPEI ILSKGY<br/> NKAVDWWALGVLVYEMAAGYPPFFADQPIQIYEKIVSGKVRFPSPHFSSDLKDLLRNLQVLDLTKRFGNLKNG<br/> VNDIKGHKWFATTDWIAIYQKKEVAPFIPKCKGPGDTSNFDDYEEEEIRVSFTEKCAKEFAEF</p> <p>&gt;ENSGACP00000024909 Gasterosteus aculeatus fixedExon5 (a)<br/> MGNAPTARKGSEMESVKEFLAKAKEDFLKKWESPAQNTAGLEQFERLKTTLGTGSFGRVMLVKHRETGQHYAM<br/> KILNKQKVVKLKQIEHTLNEKRI LQAVSFPFLVRLVLEYSFKDNTNLYMVMEYVPGGEMFSLHRRIGRFSEPHA<br/> RFYAAQIVLTFEYLHSLDLIYRDLKPENLLIDQQGYIQVTDGFGFAKRVKGRWTWLCGTPEYLAPEI ILSKGY<br/> NKAVDWWALGVLVYEMAAGYPPFFADQPIQIYEKIVSGKVRFPSPHFSSDLKDLLRNLQVLDLTKRFGNLKNG<br/> VNDIKGHKWFATTDWIAIYQKKEVAPFIPKCKGPGDTSNFDDYEEEEIRVSFNEKCGKEFAEF</p> <p>&gt;ENSGACP00000023579 Gasterosteus aculeatus (b)<br/> MGNAATAKKGNELESVKEFLAKAKEDFLRKWECPPQSATCLDDDFRDLKTTLGTGLWRVMLVKHKATEQHFAM<br/> KILDKQKVVKLKQIEHTLNEKRI LQAVSFPFLVRLVLEYSFKDNTNLYMVMEYVPGGEMFSLHRRIGRFSEPHA<br/> RFYAAQIVLTFEYLHSLDLIYRDLKPENLLIDHHGYIQVTDGFGFAKRVKGRWTWLCGTPEYLAPEI ILSKGY<br/> NKAVDWWALGVLVYEMAAGYPPFFADQPIQIYEKIVSGKVRFPSPHFSSDLKDLLRNLQVLDLTKRFGNLKNG<br/> VNDIKGHKWFATTDWIAIYERKVEAPFIPKCRGPGDTSNFDDYEEEEIRVSVTEKCGKEFAEF</p> <p>&gt;ENSGACP00000012693 Gasterosteus aculeatus (b)<br/> MGNAATAKKGNEQESVKEFLAKAKEDFLRKWECPPQSTTGLDDDFRDKTLGTGSFGRVMLVKHKEGQHFAM<br/> KILDKQKVVKLKQIEHTLNEKRI LQAVSFPFLVRLVLEYSFKDNTNLYMVMEYVPGGEMFSLHRRIGRFSEHHA<br/> RFYAAQIVLTFEYLHSLDLIYRDLKPENLLIDHHGYIQVTDGFGFAKRVKGRWTWLCGTPEYLAPEI ILSKGY<br/> NKAVDWWALGVLVYEMAAGYPPFFADQPIQIYEKIVSGKVRFPSPHFSSDLKDLLRNLQVLDLTKRFGNLKNG<br/> VNDIKNHKWFSTTDWIAIYERKVEAPFIPKCRGPGDTSNFDDYEEEDIRVSQTEKCAKEFAEF</p> |

|                        |                                                                                                                                                                                                                                                                                                                                                                                                                                                                                                                                                                                                                                                                                                                                                                                                                                                                                                                                                                                                                                                                                                                                                                                                                                                                                                                                                       |
|------------------------|-------------------------------------------------------------------------------------------------------------------------------------------------------------------------------------------------------------------------------------------------------------------------------------------------------------------------------------------------------------------------------------------------------------------------------------------------------------------------------------------------------------------------------------------------------------------------------------------------------------------------------------------------------------------------------------------------------------------------------------------------------------------------------------------------------------------------------------------------------------------------------------------------------------------------------------------------------------------------------------------------------------------------------------------------------------------------------------------------------------------------------------------------------------------------------------------------------------------------------------------------------------------------------------------------------------------------------------------------------|
| <i>T. nigroviridis</i> | <p>&gt;ENSTNIP00000013350_Tetraodon_nigroviridis (a)<br/> MGNTPTTKKGNEMESVKEFLAKAKEDFLRKKWENPAQQTAAALDHFDRKLTGLTGSGFRVMLVKHKETGQHFAM<br/> KILDKQKVVKLKQIEHTLNEKRILQAVNFPFLVCLLEHSFKDNSNLYMVMEYVPGGEMFSLRRIGRFSEPHA<br/> RFYAAQIVLTFEYLHSLDLIYRDLKPENLLIDQQGYIQVTDGFAKRVKGRWTWLCGTPEYLAPEIILSKGY<br/> NKAVDWWALGVLIIYEMAAGYPPFFADQPIQIYEKIVSGKVRFPESHSSDLKDLLRNLQVLDLTKRFGNLRNG<br/> VNDIKGHKWFAATTDWIAIYQRKVEAPFIPKCKGPGDTSNFDDYDEEEIRVSFTEKCAKEFAEF</p> <p>&gt;ENSTNIP00000015136_Tetraodon_nigroviridis (b)<br/> VSPVKEFLAKAKEDFLRKECPQRCTTGLDDDFDRKLTGLTGSGFRVMLVKHKETNQFYAMKILDKQKVVKLK<br/> QIEHTLNEKRILQAVSFPFLVRLVYAFKDNSNLYMVMEYVPGGEMFSLRRIGRFSEQHARFYAAQIILTFE<br/> YLHSLDLIYRDLKPENLLIDQQGYIQVTDGFAKRVKGRWTWLCGTPEYLAPEIILSKGYNKAVDWWALGVL<br/> IYEMAAGYPPFFADQPIQIYEKIVSGKVRFPESHSSDLKDLLRNLQVLDLTKRFGNLRNGVNDIKNHKWFST<br/> TDWIAIYEKKVEAPFLPKCRGPGDTSNFDDYEEEDVHISQTEKCAKEFDDF</p> <p>&gt;ENSTNIP00000011358_Tetraodon_nigroviridis (b)<br/> MGNAATAKKGNELESVKEFLAKAKEDFLRKECPQSTTCLDDDFDRKLTGLTGSGFRVMLVKHKETEYFYAM<br/> KILDKQKVVKLKQIEHTLNEKRILQAVSFPFLVKLEYAFKDNSNLYMVMEYVPGGEMFSLRRIGRFSEPHA<br/> RFYAAQIVLTFEYLHSLDLIYRDLKPENLLIDHGGYIQVTDGFAKRVKGRWTWLCGTPEYLAPEIILSKGY<br/> NKAVDWWALGVLIIYEMAAGYPPFFADQPIQIYEKIVSGKVRFPESHSSDLKDLLRNLQVLDLTKRFGNLRNG<br/> VNDIKGHKWFAATTDWIAIYERKVEAPFIPKCRGPGDTSNFDDYDEEEIRVSLTEKCAKEFAEF</p> |
| <i>C. intestinalis</i> | <p>&gt;ENSCINP00000013406_Ciona_intestinalis<br/> MGNTPAKKGDAESVKAFLAEAKEEFLKKNENPIQNNKSLDDFERLKTGLTGSGFRVILVKRKNENSYAMK<br/> ILDKQKVVKLKQVEHTLNEKKILQAINFPFLVKMDFSFKDNSNLYMVLEVYVIGGEMFSLRRIGRFSESHSR<br/> FYAAQIVLGFYELHYLDIYRDLKPENLLIDQQGYIQVTDGFAKRVKGRWTWLCGTPEYLAPEIILSKGYN<br/> KAVDWWALGVLIIYEMAAGYPPFFADQPIQIYEKIVSGKVRFPESHSSDLKDLLRNLQVLDLTKRFGNLRNG<br/> SDIKGHRWFQPIDWIAVYQRKLDAPFIPKFKHPGSTENFDDYEEBQLRVHSTEKCVKEFADF</p>                                                                                                                                                                                                                                                                                                                                                                                                                                                                                                                                                                                                                                                                                                                                                                                                                                                                                                              |
| <i>C. savignyi</i>     | <p>&gt;Homolog1_Ciona_savignyi<br/> MGNTPAKKGDAESVKAFLAEAKEEFLKKNENPIQNNKSLDDFERLKTGLTGSGFRVILVKRKNENTSFYAMK<br/> ILDKQKVVKLKQVEHTLNEKKILQAINFPFLVKMDFSFKDNSNLYMVLEVYVIGGEMFSLRRIGRFSESHSR<br/> FYAAQIVLGFYELHYLDIYRDLKPENLLIDQQGYIQVTDGFAKRVKGRWTWLCGTPEYLAPEIILSKGYN<br/> KAVDWWALGVLIIYEMAAGYPPFFADQPIQIYEKIVSGKVRFPESHSSDLKDLLRNLQVLDLTKRFGNLRNG<br/> ADIKGHRWFQPIDWIAVYQKLEAPFMPKFKHPGSTENFDDYEEBQLRIHSTEKCVKEFADF</p>                                                                                                                                                                                                                                                                                                                                                                                                                                                                                                                                                                                                                                                                                                                                                                                                                                                                                                                           |
| <i>P. marinus</i>      | <p>&gt;Homolog1_Petromyzon_marinus<br/> KEFLAKAKEDFMRKWNENPQNTSCLEDFERIKTLTGSGFRVMLVKHKSSDQFFAMKILDKQKVVKLKQVEH<br/> TLNEKRILQAIISFPFLVRLVLEYSFKDNSNLYMVLEVYVPGGEMFSLRRIGRFSEPHSRFYAAQIVLAFEYLHS<br/> LDLIYRDLKPENLLIDQQGYIQVTDGFAKRVKGRWTWLCGTPEYLAPEIILSKGYNKAVDWWALGVLIIYEM<br/> AAGYPPFFADQPIQIYEKIVSGKVRFPESHSSDLKDLLRNLQVLDLTKRFGNLRNGVNDIKNHKWFSTTDWI<br/> AIYQRKVEAPFIPKCKGPGDASNFDDYDEEEIRISSTEKCAKEFADF</p> <p>&gt;Homolog2_Petromyzon_marinus<br/> KEFLAKAKEDFLKKNENPQNTSCLEDFERMKTGLTGSGFRVMLVKHKATDRYFAMKILDKQKIMRLKQVEH<br/> TLNEKRILQAIISFPFLVLSLEYSYKDNSNLYMVLEVYVPGGEMFSLRRIGRFSEPHSRFYAAQIVLAFEYLHS<br/> LDLIYRDLKPENLLIDQQGYIQXXXXXXXXXXXXXXXXXXXXXXXXXXXXXXXXXXXXXXXXXXGYNKAVDWWALGVLIIYEM<br/> AAGYPPFFADQPIQIYEKIVSGK</p>                                                                                                                                                                                                                                                                                                                                                                                                                                                                                                                                                                                                       |
| <i>S. acanthias</i>    | <p>&gt;Homolog1_Squalus_acanthias<br/> MGNAATAKKGNEIESVKEFLAKAKEDFLRKEWSPQNTAGLDDFERQKTLTGSGFRVMLVKHKETEYFYAM<br/> KILDKQKVVKLKQIEHTLNEKRILQAVNFPFLVLEYSFRDNSNLYM</p> <p>&gt;Homolog2_Squalus_acanthias<br/> KSHRKNPTDLFCFKIMNQCSEVTCQQAADHKGSKMSSALQKLENLAIRLFNRSTRGSPQDFETGSESDIRPE<br/> SEYCLAWNLMKDFLAKAKEEFLEKWPSTQNTASLDDFERTKTLTGSGFRVMLVKHKITKEHYAMKILDK<br/> QKVVKLKQIEHTLNEKKILQAVRFPFLVRLVFTFKDNTNLYMVMEYIQGGEMFSLRRSRGRFSEPHARFYAA<br/> QIVLAFEYLHSLDLVYRDLK</p>                                                                                                                                                                                                                                                                                                                                                                                                                                                                                                                                                                                                                                                                                                                                                                                                                                                                          |
| <i>L. erinacea</i>     | <p>&gt;Homolog1_Leucoraja_erinacea<br/> MKLWRLTSREWNKDSNSSPSIVYKDHHPKNQEIETVKDYLEKAREEFLQKWPSONTASLDDFDRTKTLG<br/> TGSFGRVMLVKHKATKEHYAMKILDKQKVVKLKQIEHTLNEKRILQAVRFPFLVRLVFSFKDNTNLYMVMEY<br/> IQGGEMFSLRRSRGRFSEPHSRFYAAQIVLAFEYLHSLDLLYRDLKPENILN</p> <p>&gt;Homolog2_Leucoraja_erinacea<br/> MKLWRLTSREWNKDSNSSPSIVYKDHHPKNQEIETVKDYLEKAREEFLQKWPSONTASLDDFDRTKTLG<br/> TGSFGRVMLVKHRATKEHYAMKILDKQNVVQLKQIEHTLNEKRILQAVRFPFLVRLVFSQDNTNLYMAME</p>                                                                                                                                                                                                                                                                                                                                                                                                                                                                                                                                                                                                                                                                                                                                                                                                                                                                                               |
